# Supplementary material for: A simple, phosphine free, reusable Pd(ii)–2,2′-dihydroxybenzophenone–SBA-15 catalyst for arylation and hydrogenation reactions of alkenes
Source: Royal Society of Chemistry journal article supplement (doi:10.1039/c5nj02686e), 2016-01-01
Supplement: c5nj02686e1.pdf [file c5nj02686e1.pdf]

## Electronic Supplementary Information (ESI)

### A simple, phosphine free, reusable Pd(II)-2,2'-Dihydroxybenzophenone-SBA-15 catalyst for arylation and hydrogenation reactions of alkenes

Anish Lazar,<sup>ab</sup> Chathakudath P Vinod<sup>ab</sup> and Anand Pal Singh<sup>a</sup>

<sup>a</sup>Catalysis Division, CSIR-National Chemical Laboratory, Pune-411008, India

<sup>b</sup>Academy of Scientific and Innovative Research (AcSIR), Anusandhan Bhawan, 2, Rafi Marg, New Delhi-110001, India.

\*Corresponding author. Telephone No.: +91-20-2590 2497; Fax No.: + 91-20-2590 2633

*E-mail address:* [ap.singh@ncl.res.in](mailto:ap.singh@ncl.res.in) (Dr. A. P. Singh)

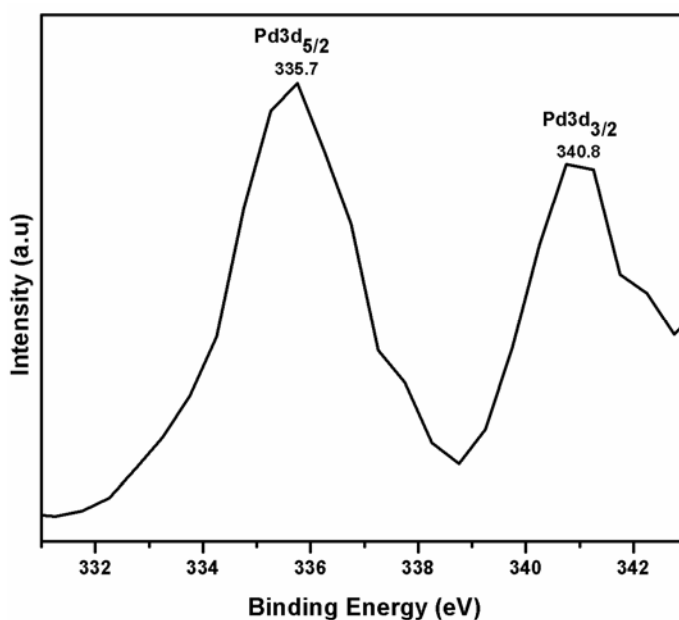

**Fig. S1:** XPS spectra of spent catalyst
